# Supplementary material for: Gas Phase Emissions of Volatile Organic Compounds Arising from the Application of Sunscreens
Source: MDPI journal article supplement (doi:10.3390/ijerph20115944), 2023-05-24

## Supplementary Information

Table S1: Classification of the 18 randomly selected PCPs for petroleum/organic ethanol for VOC contaminant analysis.

| Petroleum Derived Ethanol PCPs |    | Organic Ethanol PCPs |    |
|--------------------------------|----|----------------------|----|
| Body Wash                      | P1 | Moisturiser          | O1 |
| Face Wash                      | P2 | Liquid Hand Soap     | O2 |
| Conditioner                    | P3 | Conditioner          | O3 |
| Foundation                     | P4 | Face Wash            | O4 |
| Foundation                     | P5 | Moisturiser          | O5 |
| Moisturiser                    | P6 | Moisturiser          | O6 |
| Moisturiser                    | P7 | Bubble Bath          | O7 |
| Moisturiser                    | P8 | Body Lotion          | O8 |
| Foundation                     | P9 | Body Lotion          | O9 |

Table S2: SIFT-MS SIM method targeted scanned  $m/z$  values, and their corresponding ions, for each of the three reagent ions  $\text{H}_3\text{O}^+$ ,  $\text{NO}^+$ , and  $\text{O}_2^+$

| Compounds        | $\text{H}_3\text{O}^+ m/z$                                                                                                                                                       | $\text{NO}^+ m/z$                                                                                                    | $\text{O}_2^+ m/z$                                                                                                   |
|------------------|----------------------------------------------------------------------------------------------------------------------------------------------------------------------------------|----------------------------------------------------------------------------------------------------------------------|----------------------------------------------------------------------------------------------------------------------|
| 2-Propanol       |                                                                                                                                                                                  | 59 ( $\text{C}_3\text{H}_7\text{O}^+$ )                                                                              | 45 ( $\text{C}_2\text{H}_5\text{O}^+$ )                                                                              |
| Benzene          |                                                                                                                                                                                  | 78 ( $\text{C}_6\text{H}_6^+$ )                                                                                      | 78 ( $\text{C}_6\text{H}_6^+$ )                                                                                      |
| Benzyl Acetate   |                                                                                                                                                                                  | 150 ( $\text{C}_9\text{H}_{10}\text{O}_2^+$ )                                                                        |                                                                                                                      |
| Benzyl Alcohol   |                                                                                                                                                                                  | 107 ( $\text{C}_7\text{H}_7\text{O}^+$ )                                                                             | 107 ( $\text{C}_7\text{H}_7\text{O}^+$ )                                                                             |
| D5*              | 355 ( $\text{C}_9\text{H}_{27}\text{O}_5\text{Si}_5^+$ )<br>371 ( $\text{C}_{10}\text{H}_{31}\text{O}_5\text{Si}_5^+$ )                                                          | 355 ( $\text{C}_9\text{H}_{27}\text{O}_5\text{Si}_5^+$ )                                                             | 355 ( $\text{C}_9\text{H}_{27}\text{O}_5\text{Si}_5^+$ )                                                             |
| Di1**            | 237 ( $\text{C}_8\text{H}_{25}\text{O}_2\text{Si}_3^+$ )<br>239 ( $\text{C}_7\text{H}_{23}\text{O}_3\text{Si}_3^+$ )<br>295 ( $\text{C}_9\text{H}_{27}\text{O}_3\text{Si}_4^+$ ) | 239 ( $\text{C}_7\text{H}_{23}\text{O}_3\text{Si}_3^+$ )<br>295 ( $\text{C}_9\text{H}_{27}\text{O}_3\text{Si}_4^+$ ) | 239 ( $\text{C}_7\text{H}_{23}\text{O}_3\text{Si}_3^+$ )<br>295 ( $\text{C}_9\text{H}_{27}\text{O}_3\text{Si}_4^+$ ) |
| Di2***           | 313<br>( $\text{C}_9\text{H}_{27}\text{O}_3\text{Si}_4.\text{H}_2\text{O}^+$ )                                                                                                   | 313<br>( $\text{C}_9\text{H}_{27}\text{O}_3\text{Si}_4.\text{H}_2\text{O}^+$ )                                       | 313<br>( $\text{C}_9\text{H}_{27}\text{O}_3\text{Si}_4.\text{H}_2\text{O}^+$ )                                       |
| Ethanol          | 47 ( $\text{C}_2\text{H}_7\text{O}^+$ )<br>65 ( $\text{C}_2\text{H}_7\text{O}.\text{H}_2\text{O}^+$ )                                                                            | 45 ( $\text{C}_2\text{H}_5\text{O}^+$ )<br>63 ( $\text{C}_2\text{H}_5\text{O}.\text{H}_2\text{O}^+$ )                |                                                                                                                      |
| Ethyl Acetate    | 89 ( $\text{C}_4\text{H}_9\text{O}_2^+$ )                                                                                                                                        | 118 ( $\text{C}_4\text{H}_8\text{O}_2.\text{NO}^+$ )                                                                 | 88 ( $\text{C}_4\text{H}_8\text{O}_2^+$ )                                                                            |
| Ethylbenzene     |                                                                                                                                                                                  | 106 ( $\text{C}_8\text{H}_{10}^+$ )                                                                                  | 106 ( $\text{C}_8\text{H}_{10}^+$ )                                                                                  |
| Hexyl Acetate    |                                                                                                                                                                                  | 174 ( $\text{C}_8\text{H}_{16}\text{O}_2.\text{NO}^+$ )                                                              |                                                                                                                      |
| Limonene****     | 137 ( $\text{C}_{10}\text{H}_{17}^+$ )<br>155 ( $\text{C}_{10}\text{H}_{17}.\text{H}_2\text{O}^+$ )                                                                              | 136 ( $\text{C}_{10}\text{H}_{16}^+$ )                                                                               | 136 ( $\text{C}_{10}\text{H}_{16}^+$ )<br>137 ( $\text{C}_{10}\text{H}_{17}^+$ )                                     |
| t-Butyl Alcohol  | 57 ( $\text{C}_4\text{H}_9^+$ )                                                                                                                                                  | 57 ( $\text{C}_4\text{H}_9^+$ )                                                                                      | 59 ( $\text{C}_3\text{H}_7\text{O}^+$ )                                                                              |
| Toluene          |                                                                                                                                                                                  | 92 ( $\text{C}_7\text{H}_8^+$ )                                                                                      |                                                                                                                      |
| Trimethylsilanol |                                                                                                                                                                                  | 93 ( $\text{C}_2\text{H}_9\text{O}_2\text{Si}.\text{H}_2\text{O}^+$ )                                                |                                                                                                                      |

\*Decamethylcyclopentasiloxane

\*\*Octamethyltrisiloxane

\*\*\*Decamethyltetrasiloxane

\*\*\*\*Representing monoterpenes grouped

Table S3: Emission Factors of VOCs from 26 different sunscreens for 15 of the most commonly found and abundant species. Excluding from the statistics are products where QTOF results showed a particular VOC was not present in the original formulation

| Product | Emission Factor ( $\mu\text{g s}^{-1}\text{g}_{\text{Product}}^{-1}$ ) |          |                |                |          |          |          |          |               |              |               |          |                 |          |          |
|---------|------------------------------------------------------------------------|----------|----------------|----------------|----------|----------|----------|----------|---------------|--------------|---------------|----------|-----------------|----------|----------|
|         | 2-Propanol                                                             | Benzene  | Benzyl Acetate | Benzyl Alcohol | D5       | Di 1     | Di 2     | Ethanol  | Ethyl Acetate | Ethylbenzene | Hexyl Acetate | Limonene | t-Butyl Alcohol | Toluene  | TMS      |
| S1      | 4.07E-02                                                               | 3.78E-04 | 5.05E-02       | 6.87E-03       | 5.71E-04 | 2.93E-03 | 2.04E-03 | 7.94E+00 | 1.46E-03      | 7.56E-04     | 1.24E-03      | 1.51E-03 | 4.55E-02        | 1.02E-02 | 1.79E-01 |
| S2      | 1.23E-02                                                               |          |                |                |          | 1.32E-03 | 2.04E-03 | 3.30E+00 | 1.37E-03      | 7.56E-04     | 2.43E-04      | 1.50E-03 | 2.83E-02        |          | 8.34E-03 |
| S3      | 5.06E-03                                                               |          | 1.04E-03       |                | 3.28E-04 | 3.25E-03 | 6.17E-03 | 7.92E-01 | 3.62E-04      | 4.42E-04     | 2.51E-04      | 9.29E-04 | 2.16E-02        | 8.67E-05 | 3.46E-03 |
| S4      | 3.78E-02                                                               | 3.68E-03 | 1.07E-02       | 4.18E-03       | 1.79E-04 | 1.65E-03 | 8.65E-04 | 1.51E-02 | 5.21E-04      | 1.58E-02     | 7.40E-04      | 1.70E-02 | 5.78E-02        | 8.01E-02 | 7.46E-03 |
| S5      | 1.20E-02                                                               | 1.04E-02 | 2.08E-02       | 1.71E+00       | 3.12E-01 | 8.43E-04 | 1.47E-03 | 7.38E-04 | 4.47E-04      | 2.29E-03     |               |          | 6.36E-02        | 2.93E-02 | 2.00E-03 |
| S6      | 6.05E-01                                                               | 6.55E-04 | 2.40E-03       |                |          | 4.56E-03 | 2.33E-03 | 3.06E+00 | 1.39E-03      | 1.91E-04     |               | 1.75E-03 | 1.21E-01        | 4.96E-03 | 4.56E-02 |
| S7      | 4.89E-02                                                               |          | 1.22E-01       | 3.90E-01       | 4.97E-04 | 3.78E-02 | 8.02E-02 | 5.60E-02 | 2.54E-02      | 9.15E-03     | 9.91E-03      | 1.47E-02 | 3.84E-01        | 1.38E-02 | 4.19E-02 |
| S8      | 5.50E-03                                                               | 3.65E-03 | 4.00E-03       | 6.80E-02       | 2.07E-03 | 4.56E-02 | 1.06E+02 | 3.38E-02 |               |              | 7.03E-03      | 5.61E-03 | 1.43E-01        | 5.89E-04 | 2.35E-02 |
| S9      | 8.42E-01                                                               |          |                | 3.22E-02       | 8.11E-04 | 2.24E-03 | 2.77E-02 | 4.48E+00 | 1.47E-03      |              | 9.16E-04      | 1.86E-03 | 1.33E-02        | 3.78E-03 | 7.35E-02 |
| S10     | 1.30E-02                                                               | 7.27E-04 | 5.69E-02       | 4.50E-02       | 2.44E-04 | 1.30E-03 | 8.17E-03 | 1.05E-02 | 3.30E-04      | 2.31E-03     | 2.67E-02      | 5.10E-02 | 1.33E-02        | 6.04E-03 | 6.00E-03 |
| S11     | 1.19E-02                                                               |          |                |                | 1.24E-04 | 3.95E-03 |          | 1.65E+00 | 1.37E-03      |              | 3.75E-02      |          | 4.81E-02        | 3.54E-02 |          |
| S12     | 3.01E+00                                                               | 1.88E-03 | 2.35E-02       | 4.85E-02       | 2.94E-06 | 2.56E-03 |          | 1.08E+01 | 4.49E-03      | 1.22E-03     | 2.73E-04      |          | 2.44E-01        | 5.26E-02 | 2.38E-01 |
| S13     | 3.22E-03                                                               | 8.21E-04 | 1.27E-01       | 3.53E-02       |          | 8.73E-04 | 2.00E-02 | 1.66E-02 | 2.24E-04      | 3.84E-03     | 7.91E-04      | 3.35E-02 | 1.71E-02        | 1.72E-02 | 1.78E-02 |
| S14     | 6.28E-02                                                               | 4.40E-04 | 9.06E-03       | 3.55E-03       | 3.72E-04 | 8.39E-02 | 2.08E-01 | 8.40E-03 | 4.01E-04      | 1.44E-03     |               |          | 1.81E-01        | 1.58E-03 | 5.91E-03 |
| S15     | 7.17E-03                                                               | 4.41E-04 | 3.85E-03       | 1.15E-04       |          |          |          | 1.55E+00 | 3.80E-04      | 2.81E-03     | 1.02E-03      |          | 4.65E-02        |          |          |
| S16     | 8.23E-03                                                               | 9.13E-04 | 3.84E-02       | 2.83E-05       | 4.29E-04 | 2.69E-03 | 1.10E-02 | 6.60E-04 | 6.15E-04      | 3.40E-03     |               |          | 7.96E-02        |          | 4.61E-03 |
| S17     | 4.67E-03                                                               | 3.01E-05 | 1.13E-02       | 2.23E-03       |          |          | 1.96E-02 | 6.83E-03 | 5.39E-04      |              | 1.87E-03      | 9.63E-03 | 3.36E-02        | 1.74E-03 | 2.08E-03 |
| S18     | 9.19E-03                                                               | 2.15E-03 | 7.76E-03       | 4.18E-03       |          | 2.36E-03 | 1.82E-02 | 2.14E-02 | 8.54E-04      | 2.86E-03     | 6.19E-04      |          | 4.78E-02        | 1.92E-02 | 9.95E-03 |
| S19     | 2.46E-02                                                               | 2.48E-03 | 2.56E-02       | 2.97E-01       | 6.68E-02 |          | 1.44E+02 | 5.27E-02 | 1.34E-02      | 6.45E-03     | 2.85E-03      | 2.53E-03 | 2.54E-01        | 1.15E-03 | 1.33E-02 |
| S20     | 4.98E-02                                                               | 8.27E-05 | 5.98E-02       | 1.52E-01       |          |          |          | 5.98E+00 | 1.90E-03      | 6.89E-03     | 1.48E-03      | 6.00E-03 | 2.80E-01        | 1.31E-02 | 9.89E-02 |
| S21     | 1.16E-02                                                               | 4.32E-04 | 1.73E-03       | 1.19E-02       | 3.12E-04 | 1.04E-01 | 1.04E-01 | 2.99E+00 | 8.75E-04      | 8.04E-04     | 4.28E-02      | 2.44E-03 | 1.20E-01        | 3.33E-03 | 8.86E-02 |
| S22     | 9.43E-03                                                               | 9.08E-04 | 3.33E-02       | 1.28E-01       | 4.40E-04 |          | 2.96E-02 | 2.58E-01 | 5.80E-04      | 4.74E-03     | 5.27E-02      | 1.48E-01 | 6.02E-02        | 1.63E-02 | 1.52E-02 |
| S23     | 2.54E-02                                                               | 7.13E-04 | 2.59E-02       | 5.66E-02       | 2.88E-04 | 5.31E-04 | 3.20E-02 | 8.20E-03 | 3.94E-05      | 2.29E-04     |               |          | 1.32E-01        | 2.98E-04 |          |
| S24     | 2.09E-01                                                               | 4.57E-03 | 3.64E-02       | 6.10E-02       |          |          | 8.06E-03 | 1.58E+00 | 2.93E-04      | 1.56E-03     | 2.03E-03      | 1.20E-01 | 2.23E-01        | 7.87E-02 | 4.33E-02 |
| S25     | 9.26E-03                                                               |          | 4.35E-02       | 3.07E-02       |          | 1.14E-03 |          | 3.34E-01 | 2.53E-04      | 2.69E-03     | 7.12E-04      | 1.78E-02 | 7.73E-02        |          | 1.00E-02 |
| S26     | 3.13E-03                                                               | 1.43E-03 | 7.66E-02       | 2.57E-02       | 8.34E-05 | 3.49E-03 | 3.26E-02 | 1.66E-02 | 4.02E-04      | 4.84E-04     | 8.90E-04      | 3.54E-02 | 8.53E-02        | 3.68E-02 | 1.76E-02 |
| Mean    | 1.95E-01                                                               | 1.84E-03 | 3.44E-02       | 1.41E-01       | 2.27E-02 | 1.07E-02 | 1.25E+01 | 1.73E+00 | 2.37E-03      | 3.35E-03     | 9.17E-03      | 2.61E-02 | 1.09E-01        | 1.94E-02 | 4.16E-02 |

Table S4: Inhalation estimates for individual VOCs based on a single facial application of sunscreen presented in Table 4 and calculated headspace/inhaled ratios.

| Species          | Estimated inhalation for head, neck, and face application based on age and sex (mg) |                   |                     |                     |                    |                   |                   |
|------------------|-------------------------------------------------------------------------------------|-------------------|---------------------|---------------------|--------------------|-------------------|-------------------|
|                  | Men (16+ years)                                                                     | Women (16+ years) | Child (13-15 years) | Child (11-12 years) | Child (8-10 years) | Child (5-7 years) | Child (2-4 years) |
| Benzene          | 7.86E-03                                                                            | 6.92E-03          | 6.29E-03            | 5.47E-03            | 4.41E-03           | 3.43E-03          | 2.58E-03          |
| Benzyl Acetate   | 2.65E-01                                                                            | 2.34E-01          | 2.12E-01            | 1.85E-01            | 1.49E-01           | 1.16E-01          | 8.72E-02          |
| Benzyl Alcohol   | 4.08E+00                                                                            | 3.59E+00          | 3.27E+00            | 2.84E+00            | 2.29E+00           | 1.78E+00          | 1.34E+00          |
| D5               | 2.96E-01                                                                            | 2.61E-01          | 2.37E-01            | 2.06E-01            | 1.66E-01           | 1.29E-01          | 9.72E-02          |
| Dimethicone 1    | 9.40E-02                                                                            | 8.28E-02          | 7.53E-02            | 6.54E-02            | 5.27E-02           | 4.10E-02          | 3.09E-02          |
| Dimethicone 2    | 1.26E+02                                                                            | 1.11E+02          | 1.01E+02            | 8.78E+01            | 7.07E+01           | 5.51E+01          | 4.15E+01          |
| Ethanol          | 2.97E+01                                                                            | 2.62E+01          | 2.38E+01            | 2.07E+01            | 1.66E+01           | 1.30E+01          | 9.76E+00          |
| Ethyl Acetate    | 5.98E-03                                                                            | 5.27E-03          | 4.79E-03            | 4.16E-03            | 3.35E-03           | 2.61E-03          | 1.97E-03          |
| Ethylbenzene     | 2.34E-02                                                                            | 2.06E-02          | 1.88E-02            | 1.63E-02            | 1.31E-02           | 1.02E-02          | 7.70E-03          |
| Hexyl Acetate    | 1.84E-01                                                                            | 1.62E-01          | 1.48E-01            | 1.28E-01            | 1.03E-01           | 8.04E-02          | 6.05E-02          |
| Limonene         | 2.38E-01                                                                            | 2.10E-01          | 1.91E-01            | 1.66E-01            | 1.33E-01           | 1.04E-01          | 7.82E-02          |
| 2-Propanol       | 4.43E-01                                                                            | 3.90E-01          | 3.55E-01            | 3.08E-01            | 2.48E-01           | 1.93E-01          | 1.46E-01          |
| t-Butyl Alcohol  | 1.96E-01                                                                            | 1.73E-01          | 1.57E-01            | 1.37E-01            | 1.10E-01           | 8.57E-02          | 6.46E-02          |
| Toluene          | 1.54E-01                                                                            | 1.36E-01          | 1.24E-01            | 1.07E-01            | 8.65E-02           | 6.74E-02          | 5.07E-02          |
| Trimethylsilanol | 6.34E-02                                                                            | 5.59E-02          | 5.08E-02            | 4.42E-02            | 3.56E-02           | 2.77E-02          | 2.09E-02          |
| Total            | 1.62E+02                                                                            | 1.43E+02          | 1.30E+02            | 1.13E+02            | 9.08E+01           | 7.07E+01          | 5.32E+01          |

Table S5: Gas phase mixing ratios of contaminant species off-gassed from sunscreens for each of the 26 sunscreen products.

| Product | Benzene (ppb) | Toluene (ppb) | Ethylbenzene (ppb) |
|---------|---------------|---------------|--------------------|
| S1      | 0.3           | 6.2           |                    |
| S2      |               |               |                    |
| S3      |               |               | 0.6                |
| S4      | 4.7           | 86.7          | 14.8               |
| S5      |               | 37.2          |                    |
| S6      |               | 3             |                    |
| S7      |               |               |                    |
| S8      |               |               |                    |
| S9      |               |               |                    |
| S10     |               |               |                    |
| S11     |               | 8.3           |                    |
| S12     |               | 26.5          |                    |
| S13     | 0.5           |               | 1.6                |
| S14     |               | 1.8           |                    |
| S15     |               |               | 1.3                |
| S16     |               |               | 2.2                |
| S17     |               |               |                    |
| S18     | 1.5           |               | 1.5                |
| S19     |               |               | 3.5                |
| S20     |               |               |                    |
| S21     |               | 2.7           |                    |
| S22     |               |               |                    |
| S23     |               |               |                    |
| S24     |               | 56            |                    |
| S25     |               |               |                    |
| S26     | 1.2           | 26.6          |                    |
| Mean    | 1.6           | 25.5          | 3.6                |

Figure S1: Liquid calibration curves for four compounds. Points represent SIFT-MS measured mixing ratio. Solid line represents linear regression for SIFT-MS measured mixing ratios. Dashed lines represent delivered mixing ratio.

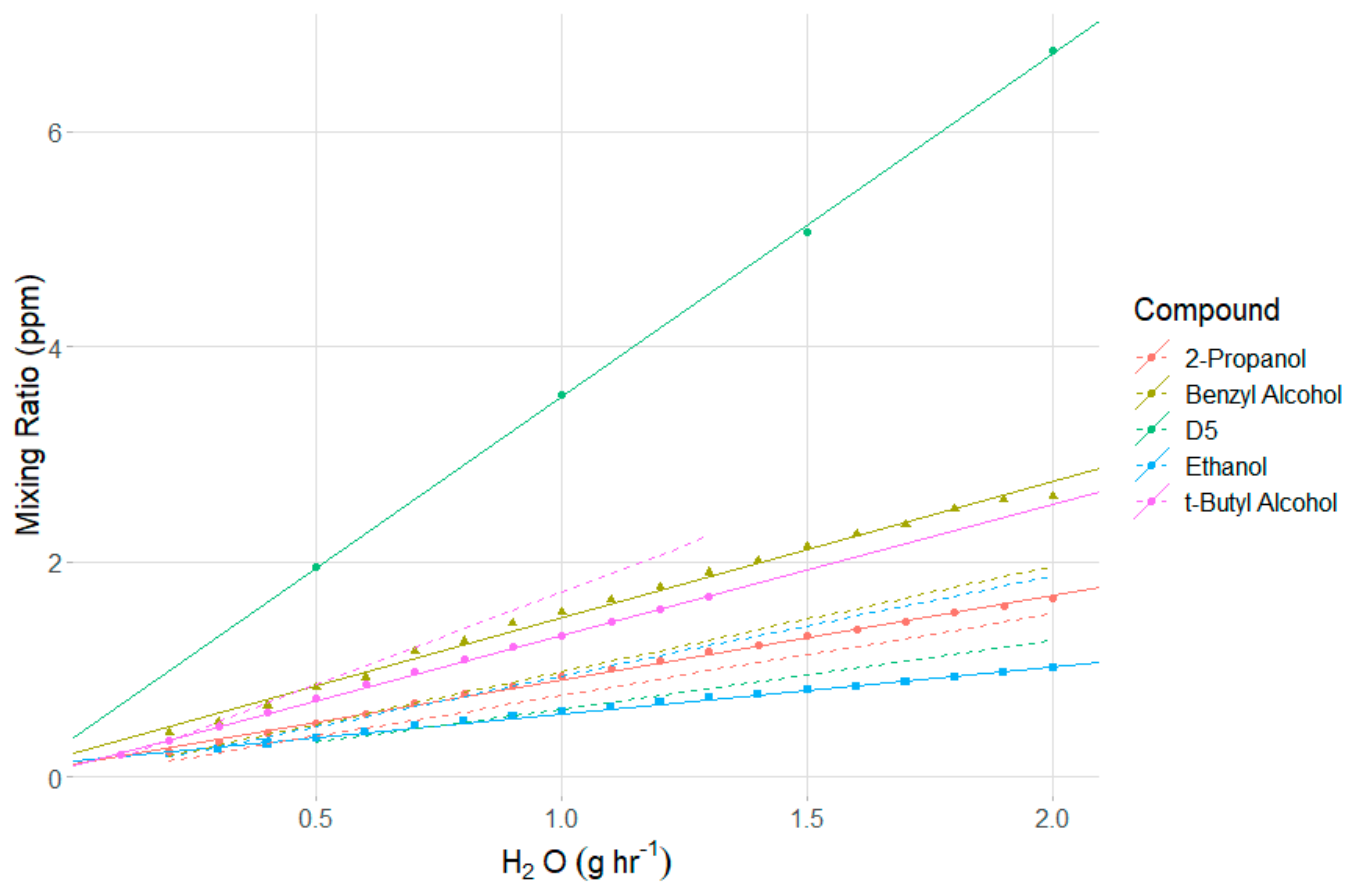

Supplement: s1 [file s1]
